# Supplementary material for: NT‐proBNP as a Mediator of the Racial Difference in Incident Atrial Fibrillation and Heart Failure
Source: PubMed Central journal article supplement — J Am Heart Assoc. 2019 Mar 26;8(7):e010868. doi: 10.1161/JAHA.118.010868 (PMC6509704; doi:10.1161/jaha.118.010868), 2019-03-26
Supplement: JAH3-8-e010868-s001.pdf [file JAH3-8-e010868-s001.pdf]

# **Supplemental Material**

**Table S1. Diagnostic criteria for baseline cardiac risk factors at study entry in the Cardiovascular Health Study and Atherosclerosis Risk in Communities cohort.**

|                                 | <b>Cardiovascular Health Study</b>                                                                                                                | <b>Atherosclerosis Risk in Communities Study</b>                                                                                                                                                           |
|---------------------------------|---------------------------------------------------------------------------------------------------------------------------------------------------|------------------------------------------------------------------------------------------------------------------------------------------------------------------------------------------------------------|
| <b>Hypertension</b>             | Systolic blood pressure $\geq$ 140mmHg, diastolic pressure $\geq$ 90 mmHg, or self-reported hypertension plus use of antihypertensive medications | Systolic blood pressure $\geq$ 140mmHg, diastolic pressure $\geq$ 90 mmHg, or antihypertensive use at baseline                                                                                             |
| <b>Coronary heart disease</b>   | History of myocardial infarct, angina, coronary bypass artery graft, or angioplasty                                                               | Self-reported history of myocardial infarct, coronary bypass artery graft, or angioplasty; Adjudicated events between Visit 1 and Visit 2                                                                  |
| <b>Congestive heart failure</b> | Self-report, with verification from medical record                                                                                                | Clinical evidence of heart failure, by Gothenburg Criteria*, or use of any heart failure medication at baseline                                                                                            |
| <b>Diabetes</b>                 | Fasting blood glucose $\geq$ 126 mmol/L or use of insulin or oral hypoglycemics                                                                   | Random blood glucose $\geq$ 200 mg/dL, fasting blood glucose $\geq$ 126 mg/dL, self-report of being told by a doctor that they had diabetes or sugar in the blood, or taking insulin or oral hypoglycemics |

\*At least 1 positive finding from each category as follows (Gothenburg Criteria): Cardiac – coronary heart disease, angina, leg edema, shortness of breath at night, rales on lung exam, atrial fibrillation on electrocardiography; Pulmonary – cough, phlegm, or wheezing, rhonchi on lung exam, history of bronchitis or asthma; Therapy – treatment with digoxin or diuretics

**Table S2. Results of Cox Proportional Hazards Model with white versus black race as a predictor of incident heart failure, adjusting for individual covariates in the Cardiovascular Health Study.**

| <b>Analysis Variables</b>    | <b>Hazard Ratio (for white race in incident HF)</b> | <b>95%CI</b> | <b>p-value</b> |
|------------------------------|-----------------------------------------------------|--------------|----------------|
| Race (white vs. black) only  | 0.87                                                | 0.75 – 1.01  | 0.07           |
| Race, Age                    | 0.91                                                | 0.78 – 1.05  | 0.20           |
| Race, Sex                    | 0.86                                                | 0.74 – 1.00  | 0.05           |
| Race, BMI                    | 0.94                                                | 0.81 – 1.09  | 0.43           |
| Race, Smoker                 | 0.88                                                | 0.76 – 1.02  | 0.10           |
| Race, Alcohol use            | 0.87                                                | 0.75 – 1.01  | 0.07           |
| Race, Diabetes               | 0.96                                                | 0.83 – 1.11  | 0.59           |
| Race, Hypertension           | 0.98                                                | 0.84 – 1.14  | 0.77           |
| Race, Diabetes, Hypertension | 1.05                                                | 0.90 – 1.22  | 0.53           |
| Race, CAD                    | 0.87                                                | 0.77 – 1.03  | 0.12           |
| Race, LVH                    | 0.95                                                | 0.82 – 1.10  | 0.51           |
| Race, Education              | 0.88                                                | 0.76 – 1.02  | 0.08           |
| Race, CKD                    | 0.86                                                | 0.75 – 1.00  | 0.05           |
| Race, Income                 | 0.97                                                | 0.83 – 1.14  | 0.73           |

BMI, body mass index; CAD, coronary artery disease; LVH, left ventricular

hypertrophy

**Table S3. Results of Cox Proportional Hazards Model with white versus black race as a predictor of incident heart failure, adjusting for individual covariates in the Atherosclerosis Risk in Communities Study.**

| <b>Analysis Variables</b>    | <b>Hazard Ratio (for white race in incident HF)</b> | <b>95%CI</b> | <b>p-value</b> |
|------------------------------|-----------------------------------------------------|--------------|----------------|
| Race (white vs. black)       | 0.66                                                | 0.60 – 0.73  | <0.001         |
| Race, Age                    | 0.58                                                | 0.53 – 0.65  | <0.001         |
| Race, Sex                    | 0.62                                                | 0.56 – 0.69  | <0.001         |
| Race, BMI                    | 0.80                                                | 0.72 – 0.89  | <0.001         |
| Race, Smoker                 | 0.63                                                | 0.57 – 0.70  | <0.001         |
| Race, Alcohol use            | 0.67                                                | 0.60 – 0.74  | <0.001         |
| Race, Diabetes               | 0.75                                                | 0.68 – 0.83  | <0.001         |
| Race, Hypertension           | 0.82                                                | 0.74 – 0.91  | <0.001         |
| Race, Diabetes, Hypertension | 0.89                                                | 0.80 – 0.99  | 0.03           |
| Race, CAD                    | 0.61                                                | 0.55 – 0.68  | <0.001         |
| Race, LVH                    | 0.71                                                | 0.64 – 0.78  | <0.001         |
| Race, Creatinine             | 0.68                                                | 0.61 – 0.75  | <0.001         |
| Race, Education              | 0.79                                                | 0.72 – 0.88  | <0.001         |
| Race, Income                 | 1.06                                                | 0.94 – 1.19  | 0.33           |

BMI, body mass index; CAD, coronary artery disease; LVH, left ventricular hypertrophy
